# Supplementary material for: A Novel Pseudoalteromonas xiamenensis Marine Isolate as a Potential Probiotic: Anti-Inflammatory and Innate Immune Modulatory Effects against Thermal and Pathogenic Stresses
Source: MDPI journal article supplement (doi:10.3390/md19120707), 2021-12-15
Supplement: s1 [file s1]

## Supplementary Materials

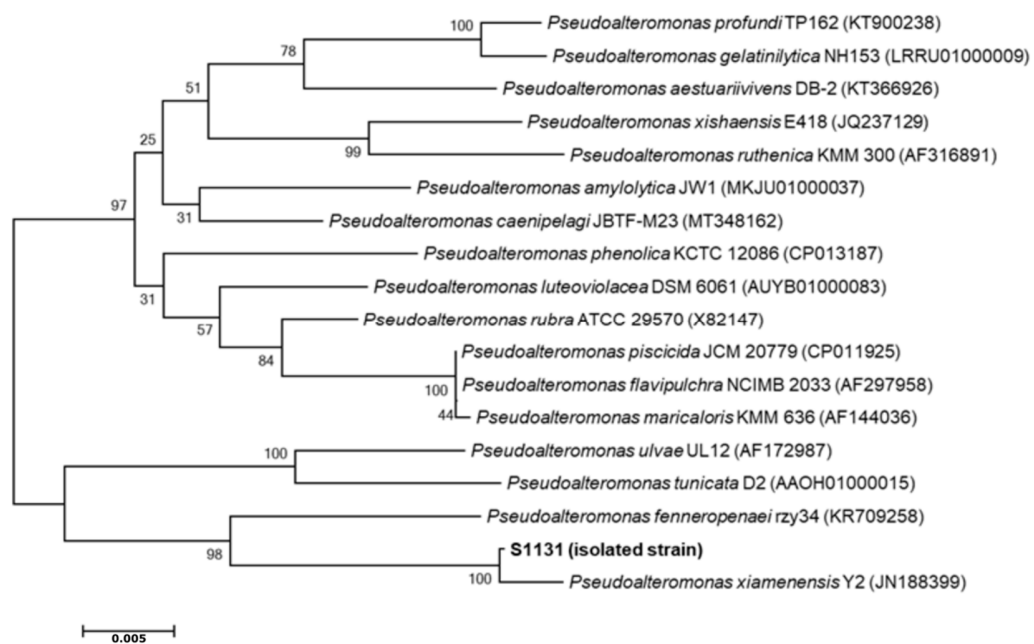

**Figure S1.** Phylogenetic tree based on 16S rRNA sequences showing the relationship of strain S1131 with type strains of the genus *Pseudoalteromonas*. Accession numbers are given in parenthesis. Bar, 0.005 substitutions per nucleotide position.

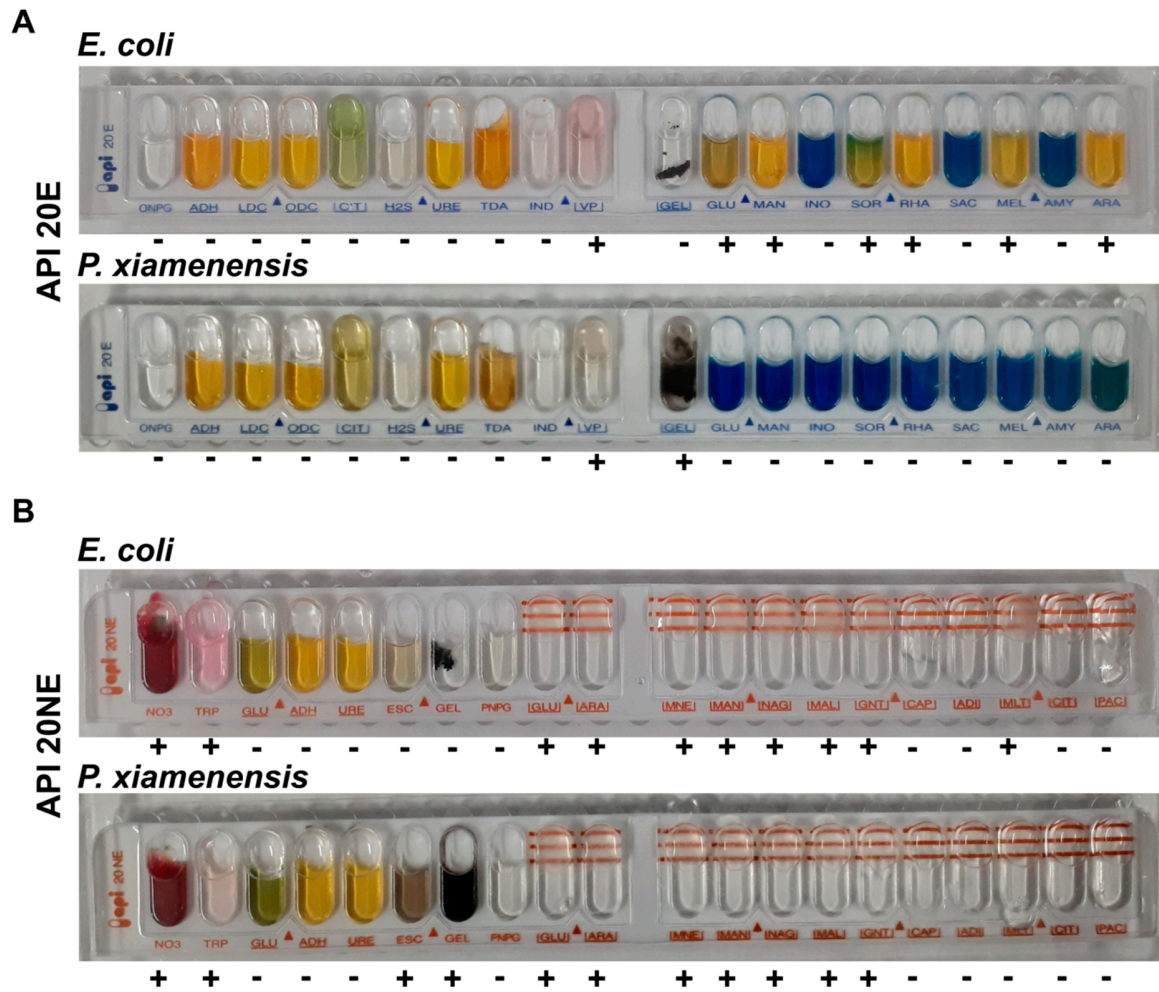

**Figure S2.** Biochemical characterization of *P. xiamenensis*. (A) API 20E assay results of *P. xiamenensis* as compared to *E. coli* DH5α. (B) API20NE assay results of *P. xiamenensis* as compared to *E. coli* DH5α. + mark indicates positive reaction and – mark indicates the negative reaction.

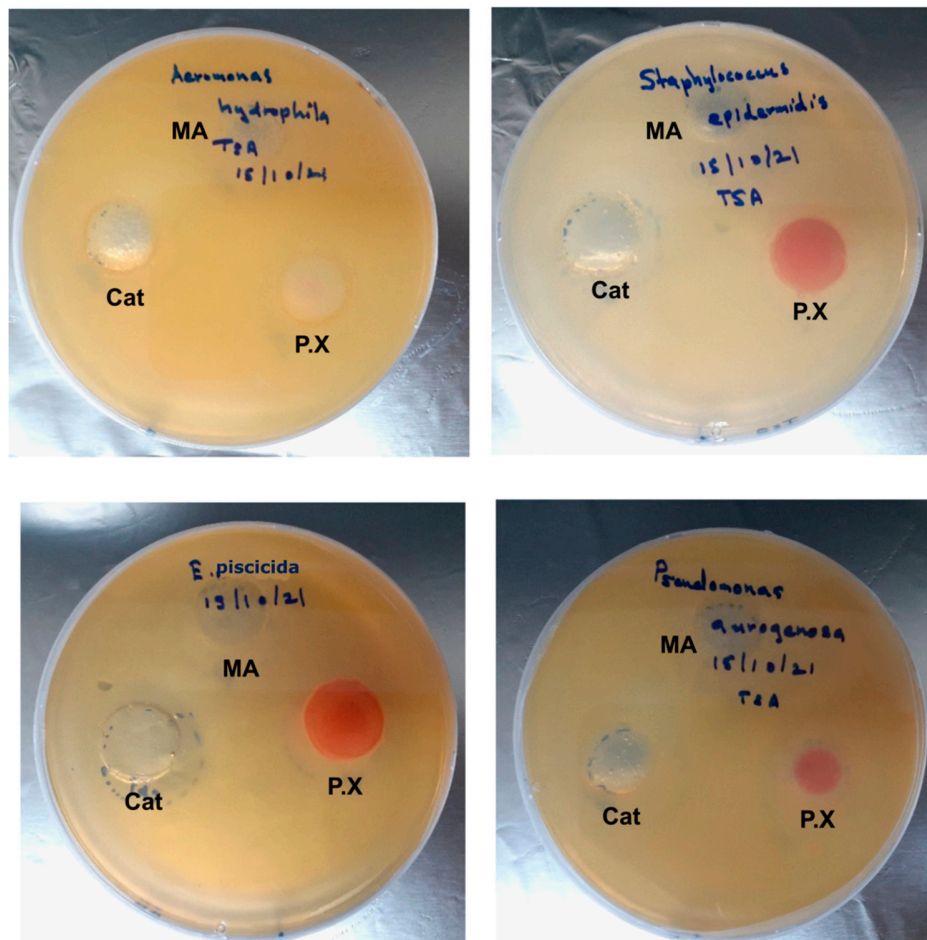

MA: Marine agar (0.8% soft agar)  
 Cat : Chloramphenicol 50 µg/mL  
 P.X: *P. xiamenensis*

**Figure S3.** Assessment of antimicrobials secretion of *P. xiamenensis*. Agar diffusion test was conducted to assess the inhibition ability of *P. xiamenensis* on *A. hydrophila*, *S. epidermidis*, *E. piscicida*, and *P. aeruginosa*. The test bacterium was inoculated into the soft agar and overlayed on the pre-solidified agar plates. Wells were cut and filled with marine agar containing *P. xiamenensis*. MA: Marine agar (0.8 % soft agar), Chl: chloramphenicol (50 µg/mL), P.X: *P. xiamenensis*.

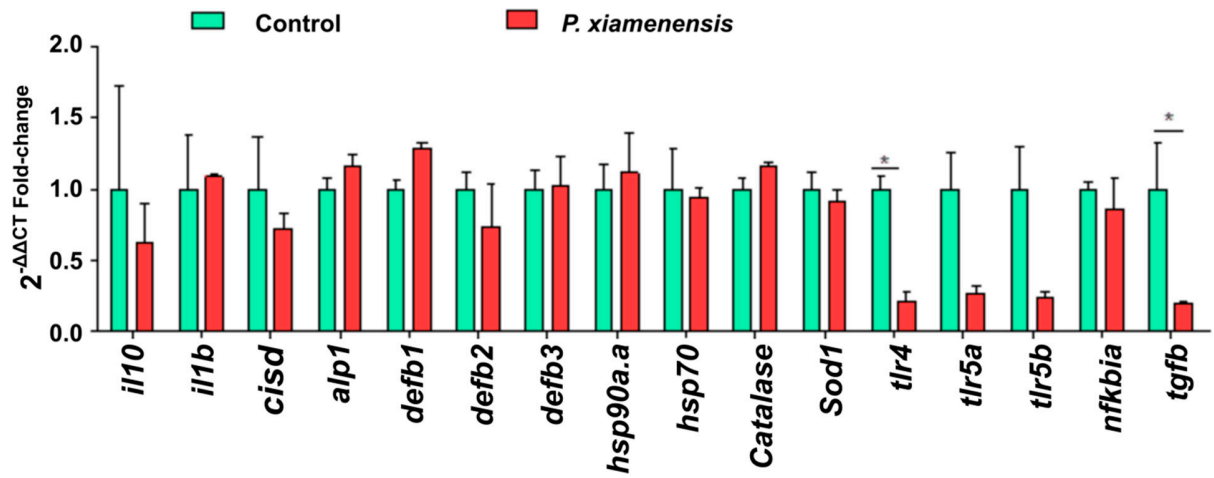

**Figure S4.** Quantitative real-time PCR for cytokines. Relative mRNA expression of immune-modulatory genes in *P. xiamenensis* enriched zebrafish larvae. Zebrafish larvae (60 hpf) were enriched with *P. xiamenensis* three times at 60 hpf, 6 dpf, and 9 dpf and were sampled at 10 dpf for isolating the RNA. Relative expression-fold is presented as mean  $\pm$  standard error. The asterisk marks are used to indicate statistical significance (t-test \*,  $p < 0.05$ ).

**Table S1:** Bacterial strains and primers used in the study

| Bacterial strain/Gene name                                          | Reference/Accession number         | Primer name                        | Primer sequence 5'-3'                                |
|---------------------------------------------------------------------|------------------------------------|------------------------------------|------------------------------------------------------|
| <b>Bacteria strains</b>                                             |                                    |                                    |                                                      |
| <i>Pseudoalteromonas xiamenensis</i> S1131                          | Gamma proteobacteria<br>This study |                                    |                                                      |
| <i>Edwardsiella piscicida</i>                                       | Lab isolate                        |                                    |                                                      |
| <i>Salmonella typhimurium</i>                                       | ATCC14028, Lab stock               |                                    |                                                      |
| <i>Salmonella epidermidis</i>                                       | Lab isolate                        |                                    |                                                      |
| <i>Aeromonas hydrophila</i>                                         | Lab isolate                        |                                    |                                                      |
| <i>Pseudomonas aeruginosa</i>                                       | Lab isolate                        |                                    |                                                      |
| <b>Genes</b>                                                        |                                    |                                    |                                                      |
| Toll-like receptor 2 ( <i>tlr2</i> )                                | NM_212812.1                        | tlr2-F<br>tlr2-R                   | TCTCCGCTCTGGTTTCAC<br>GGTCCCACAGTTGAGTATG            |
| Toll-like receptor4 ( <i>tlr4</i> )                                 | AY388400.1                         | tlr4-F<br>tlr4-R                   | GGAATAATGGGCAGCCGTAAG<br>AGCGACACCAGGAAGTATCAATG     |
| Toll-like receptor5a ( <i>tlr5a</i> )                               | AY389449.1                         | tlr5a-F<br>tlr5a-R                 | ACTCCGCTGTGCTTTGA<br>GTTTAGACACCACGCAATGG            |
| Toll-like receptor5b ( <i>tlr5b</i> )                               | BC163185.1                         | tlr5b-F<br>tlr5b-R                 | GAAACATTCACCCTGGCACA<br>CTACAACCAGCACCACCAGAATG      |
| Myeloid differentiation primary response factor 88 ( <i>myd88</i> ) | DQ100359.1                         | myd88-F<br><br>myd88-R             | AACAACCTTCGCTGGATAA<br><br>GTTACTGGAATCGCCTCA        |
| Interleukin-1 $\beta$ ( <i>il1 <math>\beta</math></i> )             | AY340959.1                         | il1 $\beta$ -F<br>il1 $\beta$ -R   | TCAAACCCCAATCCACAGAG<br>TCACTTCACGCTCTTGGATG         |
| ZF NF-kappaB inhibitor alpha-like protein B ( <i>nfkbia</i> )       | AY163841.1                         | nfkbia-F<br><br>nfkbia-R           | GGGTTGGATTTCGTTAAAAG<br><br>CGTGGATAATGGCGAGATGTAG   |
| Tumor necrosis factor- $\alpha$ ( <i>tnf<math>\alpha</math></i> )   | AY427649                           | tnf $\alpha$ -F<br>tnf $\alpha$ -R | AGAAGGAGAGTTGCCTTTACCGCT<br>AACACCCTCCATACACCCGACTTT |
| Interleukin-6 ( <i>il6</i> )                                        | JN698962.1                         | il6-F<br>il6-R                     | TCAACTTCTCCAGCGTGATG<br>TCTTTCCTCTTTTCCTCCTG         |
| Interleukin-10 ( <i>il10</i> )                                      | AY887900.1                         | il10-F<br>il10-R                   | CCCTATGGATGTCACGTCATG<br>CATATCCCGCTTGAGTTCCTG       |
| Transforming growth factor $\beta$ ( <i>tgf<math>\beta</math></i> ) | XM_687246                          | tgf $\beta$ -F<br>tgf $\beta$ -R   | CCCAAGGAACCAGAAGTAGAAG<br>GGATCTTCTATGGTGTGCTGAA     |
| Mucin 2.1 ( <i>muc2.1</i> )                                         | NC_007136.7                        | muc 2.1-F<br>muc 2.1-R             | AATATGCCTTGCGGAACAAC<br>GTGCTGAGGTTGCAGAATGA         |
| Mucin 5.1 ( <i>muc5.1</i> )                                         | XM_009297795.1                     | muc 5.1-F<br>muc 5.1-R             | TGGCAACTTGGCTGATGATA<br>TCGTACACGACGACAGTAGA         |
| Mucin 5.2 ( <i>muc5.2</i> )                                         | XM_009297793.1                     | muc 5.2-F<br>muc 5.2-R             | GGTGTCTGTCCGATCAATC<br>TCATCCTTGTCGCCATTGTA          |
| Mucin 5.3 ( <i>muc5.3</i> )                                         | ENS DARG00000089847                | muc 5.3-F<br>muc 5.3-R             | GGGGAAACTACACCAGCAA<br>TGTGAATTCTGTGCCAGAGC          |
| Intestinal alkaline phosphatase1 ( <i>alp1</i> )                    | JX847416.1                         | alp1-F<br>alp1-R                   | GTTCCCTTAGAATCCGAGACAC<br>GGCCACATAGTTCTGCTCTT       |
| Intestinal alkaline phosphatase 2 ( <i>alpi.2</i> )                 | JX847417.1                         | alpi.2-F<br>alpi.2-R               | CAGCAGGATTCGATGGATGT<br>ATTGAGAGCGATGCGTGATG         |
| Intestinal alkaline phosphatase ( <i>alpi3</i> )                    | JX847418.1                         | alp3-F<br>alp3-R                   | ATCTCTCCAGGGCGTTTATG<br>CAGTGGATGTGTCTGGGTTT         |
| Beta defensin $\beta 1$ ( <i>def <math>\beta 1</math></i> )         | NM_001081553.1                     | defb1-F                            | CTGCTTGCTCTGTCTGCTACT                                |

|                                                             |                |                  |                          |
|-------------------------------------------------------------|----------------|------------------|--------------------------|
| Beta defensin $\beta 2$ ( <i>def <math>\beta 2</math></i> ) | NM_001081554.1 | defb1-R          | GCAAACACACTCCTTGTCTG     |
|                                                             |                | defb2-F          | CTTCATTACATTGCCTGCACTT   |
| Beta defensin $\beta 3$ ( <i>def <math>\beta 3</math></i> ) | NM_001081555.1 | defb2-R          | GTACCCACACGTCCAATTCT     |
|                                                             |                | defb3-F          | CCAATGATACAGACGTGCAGAG   |
| Heat shock protein ( <i>hsp70</i> )                         | NM_002154.4    | defb3-R          | GCAGCCACGATAACCAATCA     |
|                                                             |                | hsp70-F          | GACCTGCCAATCGAGAATCA     |
| Heat shock protein ( <i>hsp90a.a</i> )                      | NM_131328.1    | hsp70-R          | CCGCTCCTTCTCCAGTTTATC    |
|                                                             |                | hsp90a.a-F       | CATCGCTAAATCTGGCACAAG    |
| Heat shock protein ( <i>hsp90ab1</i> )                      | NM_131310.3    | hsp90a.a-R       | GCCACCAGATACGCAGAATAA    |
|                                                             |                | hsp90ab1- F      | GAAGAGGAGAAGGCAGAGAAAG   |
| CDGSH iron-sulfur domain ( <i>cisd</i> )                    | NM_131710.2    | hsp90ab1-R       | CGAGCCGACATCTTCAATCT     |
|                                                             |                | cisd-F           | GAACCCTCAGACGAACACTAAG   |
| Catalase                                                    | NM_001752.4    | cisd-R           | GGGAAGCCCAGGTTGTATTT     |
|                                                             |                | catalase-F       | AGGGTGCTGCTCCAAATTAC     |
| Superoxide dismutase ( <i>sod1</i> )                        | NM_011434.2    | catalase-R       | TGTTGAATCTCCGCACTTCTC    |
|                                                             |                | sod1-F           | GGTTCCACGTCCATCAGTATG    |
| $\beta$ - actin                                             | AF025305       | sod1-R           | GTCTCCAACATGCCTCTCTTC    |
|                                                             |                | $\beta$ actin- F | AATCTTGCGGTATCCACGAGACCA |
|                                                             |                | $\beta$ actin- R | TCTCCTTCTGCATCCTGTCAGCAA |

---

**Table S2.** Analytical Profile Index (API) 20E and 20NE biochemical test results of *P. xiamenensis*

***P. xiamenensis*: API 20E**

| Test                        | Results |
|-----------------------------|---------|
| $\beta$ -galactosidase      | -       |
| Arginine dihydrolase        | -       |
| Lysine decarboxylase        | -       |
| Ornithine decarboxylase     | -       |
| Citrate utilization         | -       |
| H <sub>2</sub> S production | -       |
| Urease production           | -       |
| Tryptophan deaminase        | -       |
| Indole production           | -       |
| Voges-Proskauer reaction    | +       |
| Gelatinase production       | +       |
| Glucose                     | -       |
| Mannitol                    | -       |
| Inositol                    | -       |
| Sorbitol                    | -       |
| Rhamnose                    | -       |
| Saccharose                  | -       |
| Melibiose                   | -       |
| Amygdalin                   | -       |
| Arabinose                   | -       |

***P. xiamenensis*: API 20NE**

| Test                   | Results |
|------------------------|---------|
| Potassium nitrate      | +       |
| Tryptophan             | +       |
| Glucose (fermentation) | -       |
| Arginine               | -       |
| Urea                   | -       |
| Aesculin               | +       |
| Gelatine               | +       |
| pNPGb                  | -       |
| Glucose (Utilization)  | +       |
| Arabinose              | +       |
| Mannose                | +       |
| Mannitol               | +       |
| N-Acetyl-glucosamine   | +       |
| Maltose                | +       |
| Gluconate              | +       |
| Caprate                | -       |
| Adipate                | -       |
| Malate                 | -       |
| Citrate                | -       |
| Phenyl-acetate         | -       |
